# Supplementary material
Source: PubMed Central journal article supplement (PMC3476628)

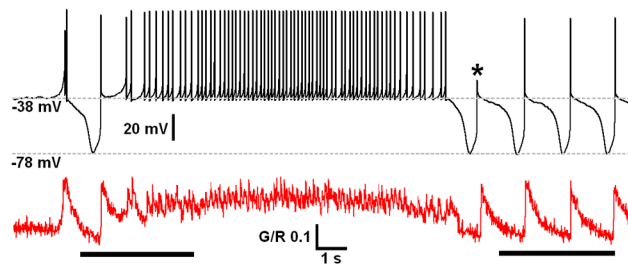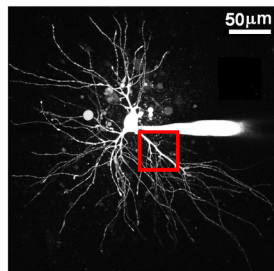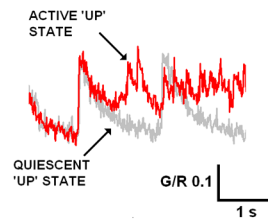

Supplement: tjp0590-3691-SD1.pdf [file tjp0590-3691-SD1.pdf]
